# Supplementary material
Source: MDPI journal article supplement (https://www.mdpi.com/2077-1312/11/2/356)
Supplement: s1 [file s1]

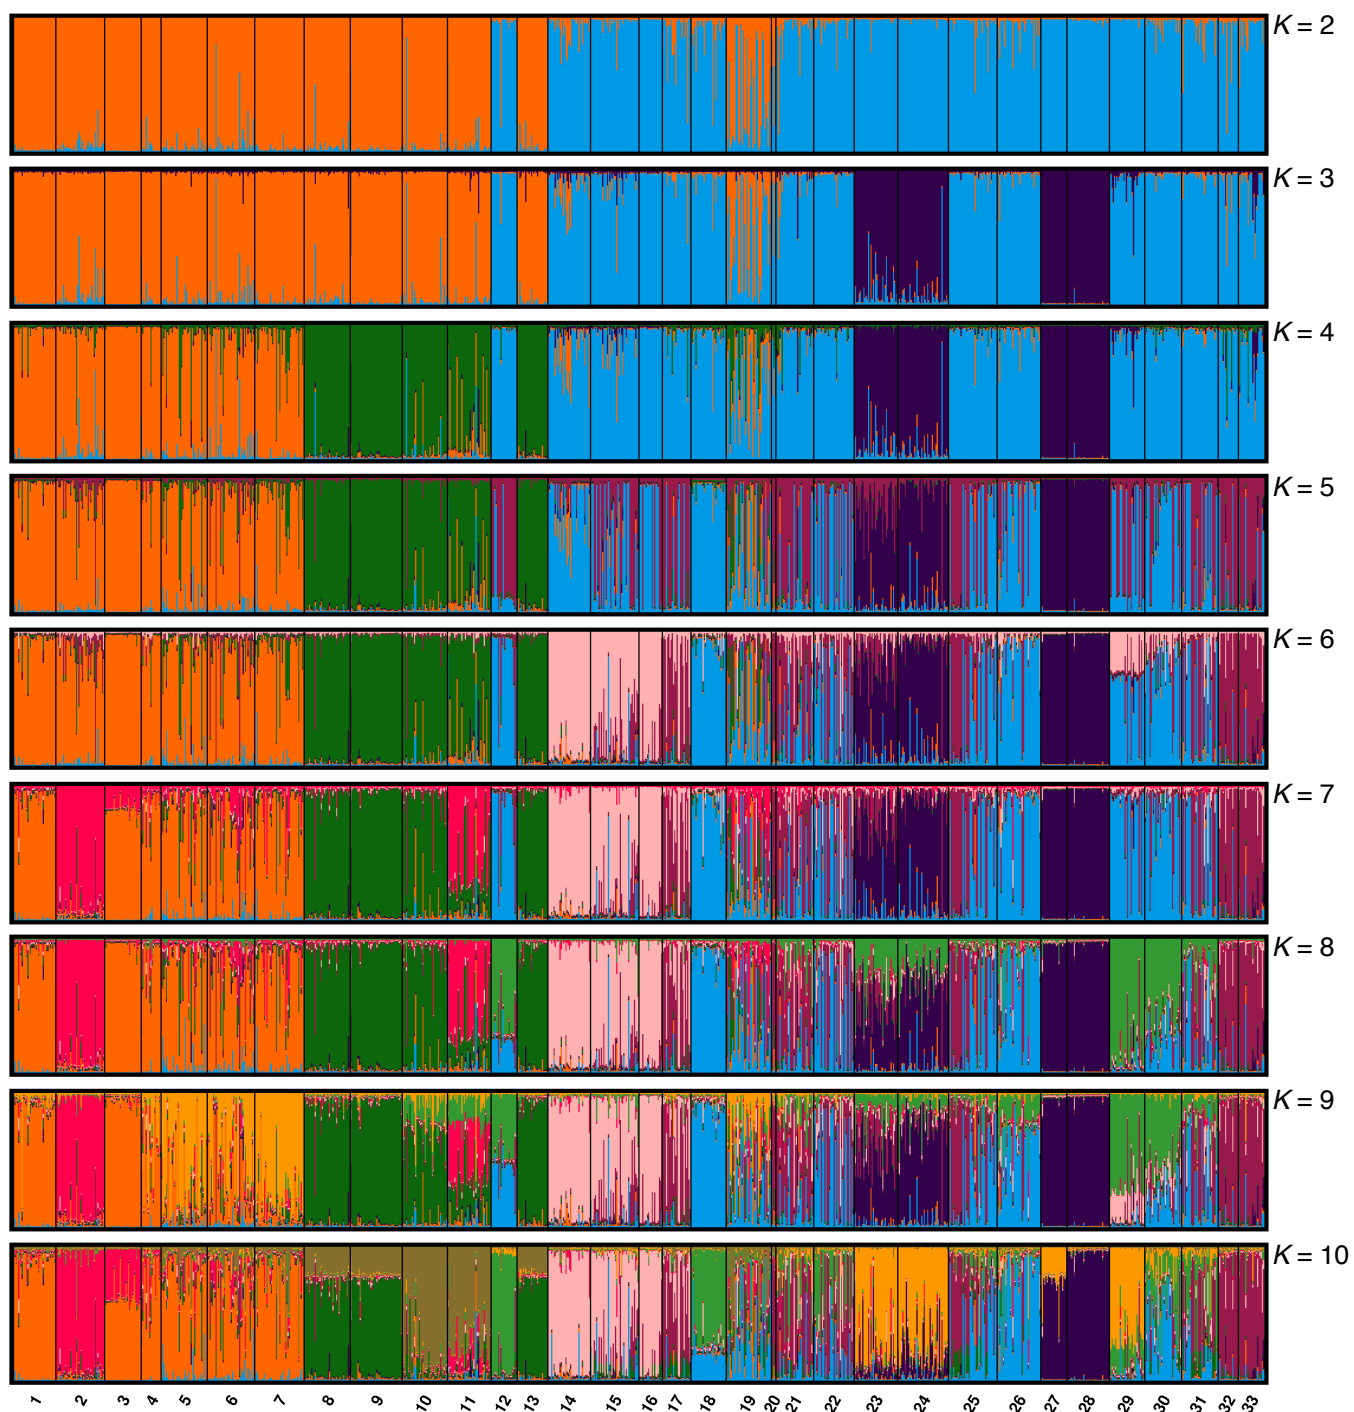

**Figure S1.** Panels output from STRUcTURE analysis of 1058 genets at 33 sites after removing clonal duplicates. The number of clusters was assumed to be between 2 and 10 (i.e.,  $K = 2$  to  $K = 10$ ). The panels were output from the CLUMPAK server. The number under each panel corresponds to the site number, as described in Table 1.

Table S1. Population genetic parameters per locus for each site.

| Site            |     | Themp030 | Themp041 | Themp047 | Themp048 | Themp049  | Themp066  | Themp103 | Themp107 | Themp193 |
|-----------------|-----|----------|----------|----------|----------|-----------|-----------|----------|----------|----------|
| B-CNR<br>G = 36 | NA  | 3        | 2        | 2        | 8        | 1         | 2         | 2        | 2        | 1        |
|                 | AR  | 2.47     | 2.00     | 1.73     | 7.19     | 1.00      | 1.96      | 1.47     | 1.47     | 1.00     |
|                 | PA  | 0        | 0        | 0        | 0        | 0         | 0         | 0        | 0        | 0        |
|                 | HO  | 0.389    | 0.444    | 0.000    | 0.889    | 0.000     | 0.083     | 0.028    | 0.028    | 0.000    |
|                 | HE  | 0.506    | 0.475    | 0.054    | 0.806    | 0.000     | 0.129     | 0.027    | 0.027    | 0.000    |
|                 | FIS | 0.231    | 0.065    | 1.000*** | -0.103   | N.A.      | 0.355*    | -0.014   | -0.014   | N.A.     |
| B-NLP<br>G = 41 | NA  | 5        | 3        | 3        | 12       | 2         | 3         | 2        | 2        | 2        |
|                 | AR  | 4.77     | 2.41     | 2.42     | 9.06     | 2.00      | 2.66      | 1.42     | 2.00     | 2.00     |
|                 | PA  | 0        | 0        | 0        | 0        | 0         | 0         | 0        | 0        | 0        |
|                 | HO  | 0.683    | 0.268    | 0.390    | 0.902    | 0.244     | 0.415     | 0.024    | 0.634    | 0.268    |
|                 | HE  | 0.656    | 0.253    | 0.421    | 0.835    | 0.476     | 0.473     | 0.024    | 0.497    | 0.232    |
|                 | FIS | -0.040   | -0.060   | 0.073    | -0.081   | 0.488**   | 0.124***  | -0.012   | -0.275   | -0.155   |
| N-TPL<br>G = 31 | NA  | 3        | 1        | 2        | 13       | 2         | 1         | 2        | 1        | 1        |
|                 | AR  | 2.54     | 1.00     | 2.00     | 9.40     | 1.55      | 1.00      | 2.00     | 1.00     | 1.00     |
|                 | PA  | 0        | 0        | 0        | 0        | 0         | 0         | 0        | 0        | 0        |
|                 | HO  | 0.194    | 0.000    | 0.226    | 0.774    | 0.032     | 0.000     | 0.355    | 0.000    | 0.000    |
|                 | HE  | 0.203    | 0.000    | 0.200    | 0.776    | 0.032     | 0.000     | 0.367    | 0.000    | 0.000    |
|                 | FIS | 0.049*   | N.A.     | -0.127   | 0.003    | -0.016    | N.A.      | 0.033    | N.A.     | N.A.     |
| N-BYG<br>G = 17 | NA  | 6        | 3        | 3        | 8        | 1         | 2         | 1        | 1        | 1        |
|                 | AR  | 6.00     | 3.00     | 3.00     | 8.00     | 1.00      | 2.00      | 1.00     | 1.00     | 1.00     |
|                 | PA  | 0        | 0        | 0        | 0        | 0         | 0         | 0        | 0        | 0        |
|                 | HO  | 0.706    | 0.412    | 0.235    | 0.706    | 0.000     | 0.294     | 0.000    | 0.000    | 0.000    |
|                 | HE  | 0.647    | 0.348    | 0.386    | 0.806    | 0.000     | 0.251     | 0.000    | 0.000    | 0.000    |
|                 | FIS | -0.091   | -0.184   | 0.390*   | 0.124    | N.A.      | -0.172    | N.A.     | N.A.     | N.A.     |
| W-AND<br>G = 39 | NA  | 12       | 2        | 3        | 16       | 2         | 2         | 3        | 2        | 2        |
|                 | AR  | 10.05    | 2.00     | 3.00     | 12.17    | 2.00      | 1.69      | 2.68     | 1.91     | 1.91     |
|                 | PA  | 0        | 0        | 0        | 0        | 0         | 0         | 0        | 0        | 0        |
|                 | HO  | 0.897    | 0.667    | 0.179    | 0.923    | 0.231     | 0.051     | 0.282    | 0.103    | 0.103    |
|                 | HE  | 0.868    | 0.473    | 0.624    | 0.891    | 0.204     | 0.050     | 0.285    | 0.097    | 0.097    |
|                 | FIS | -0.034*  | -0.408*  | 0.712*** | -0.036   | -0.130    | -0.026    | 0.010    | -0.054   | -0.054   |
| W-SAN<br>G = 40 | NA  | 14       | 2        | 3        | 13       | 2         | 3         | 2        | 2        | 2        |
|                 | AR  | 10.43    | 2.00     | 3.00     | 10.69    | 1.97      | 2.32      | 1.99     | 1.97     | 1.67     |
|                 | PA  | 0        | 0        | 0        | 0        | 0         | 0         | 0        | 0        | 0        |
|                 | HO  | 0.925    | 0.250    | 0.175    | 0.925    | 0.150     | 0.125     | 0.200    | 0.150    | 0.050    |
|                 | HE  | 0.862    | 0.289    | 0.624    | 0.871    | 0.139     | 0.118     | 0.180    | 0.139    | 0.049    |
|                 | FIS | -0.073   | 0.134    | 0.720*** | -0.062   | -0.081    | -0.055    | -0.111   | -0.081   | -0.026   |
| W-ILM<br>G = 42 | NA  | 10       | 2        | 5        | 13       | 3         | 3         | 2        | 2        | 2        |
|                 | AR  | 9.24     | 2.00     | 3.93     | 9.21     | 2.94      | 2.53      | 1.96     | 1.65     | 2.00     |
|                 | PA  | 0        | 0        | 0        | 0        | 0         | 0         | 0        | 0        | 0        |
|                 | HO  | 0.857    | 0.476    | 0.381    | 0.738    | 0.286     | 0.095     | 0.143    | 0.048    | 0.286    |
|                 | HE  | 0.831    | 0.459    | 0.556    | 0.782    | 0.274     | 0.135     | 0.133    | 0.046    | 0.278    |
|                 | FIS | -0.031   | -0.037   | 0.315    | 0.056    | -0.045    | 0.294*    | -0.077   | -0.024   | -0.029   |
| W-CMY<br>G = 39 | NA  | 8        | 2        | 3        | 10       | 3         | 4         | 4        | 3        | 2        |
|                 | AR  | 6.13     | 1.91     | 3.00     | 7.39     | 2.83      | 3.12      | 3.51     | 2.44     | 2.00     |
|                 | PA  | 0        | 0        | 0        | 0        | 0         | 1         | 2        | 0        | 0        |
|                 | HO  | 0.821    | 0.103    | 0.410    | 0.718    | 0.513     | 0.667     | 0.308    | 0.410    | 0.513    |
|                 | HE  | 0.724    | 0.097    | 0.500    | 0.715    | 0.447     | 0.518     | 0.311    | 0.346    | 0.460    |
|                 | FIS | -0.134   | -0.054   | 0.179    | -0.004** | -0.148*** | -0.286*** | 0.012*   | -0.185   | -0.114   |
| W-MOR<br>G = 44 | NA  | 5        | 2        | 3        | 6        | 3         | 2         | 3        | 3        | 2        |
|                 | AR  | 4.30     | 2.00     | 2.92     | 4.03     | 2.39      | 1.63      | 2.39     | 2.38     | 2.00     |
|                 | PA  | 0        | 0        | 0        | 0        | 0         | 0         | 0        | 0        | 0        |
|                 | HO  | 0.591    | 0.455    | 0.568    | 0.455    | 0.614     | 0.045     | 0.432    | 0.250    | 0.455    |
|                 | HE  | 0.598    | 0.397    | 0.482    | 0.498    | 0.471     | 0.044     | 0.343    | 0.238    | 0.474    |
|                 | FIS | 0.013    | -0.146   | -0.180   | 0.088    | -0.303    | -0.023    | -0.258   | -0.049   | 0.041    |
| D-BLT<br>G = 38 | NA  | 9        | 2        | 4        | 5        | 3         | 3         | 1        | 2        | 1        |
|                 | AR  | 7.47     | 2.00     | 3.84     | 4.83     | 2.87      | 2.45      | 1.00     | 1.91     | 1.00     |
|                 | PA  | 0        | 0        | 0        | 0        | 0         | 0         | 0        | 0        | 0        |
|                 | HO  | 0.763    | 0.605    | 0.289    | 0.711    | 0.158     | 0.237     | 0.000    | 0.053    | 0.000    |
|                 | HE  | 0.770    | 0.497    | 0.342    | 0.736    | 0.216     | 0.305     | 0.000    | 0.100    | 0.000    |
|                 | FIS | 0.009*** | -0.218   | 0.155*** | 0.034    | 0.268***  | 0.224     | N.A.     | 0.472**  | N.A.     |
| D-MCH<br>G = 37 | NA  | 8        | 2        | 3        | 8        | 2         | 2         | 1        | 2        | 2        |
|                 | AR  | 5.67     | 2.00     | 3.00     | 6.78     | 2.00      | 1.46      | 1.00     | 2.00     | 1.92     |
|                 | PA  | 0        | 0        | 0        | 0        | 0         | 0         | 0        | 0        | 0        |
|                 | HO  | 0.486    | 0.432    | 0.054    | 0.784    | 0.216     | 0.027     | 0.000    | 0.541    | 0.054    |
|                 | HE  | 0.552    | 0.456    | 0.461    | 0.687    | 0.456     | 0.027     | 0.000    | 0.497    | 0.102    |
|                 | FIS | 0.118*** | 0.051    | 0.883*** | -0.141   | 0.526**   | -0.014    | N.A.     | -0.088   | 0.471**  |
| D-HNR<br>G = 22 | NA  | 3        | 2        | 3        | 6        | 2         | 1         | 1        | 2        | 2        |
|                 | AR  | 3.00     | 2.00     | 3.00     | 5.32     | 1.95      | 1.00      | 1.00     | 1.99     | 1.99     |
|                 | PA  | 0        | 0        | 0        | 0        | 0         | 0         | 0        | 0        | 0        |
|                 | HO  | 0.727    | 0.227    | 0.136    | 0.636    | 0.091     | 0.000     | 0.000    | 0.136    | 0.136    |

|        |     |          |         |          |           |          |           |          |           |        |
|--------|-----|----------|---------|----------|-----------|----------|-----------|----------|-----------|--------|
| D-LMB  | He  | 0.633    | 0.491   | 0.505    | 0.614     | 0.087    | 0.000     | 0.000    | 0.127     | 0.127  |
|        | Fis | −0.148   | 0.537*  | 0.730*** | −0.037    | −0.048   | N.A.      | N.A.     | −0.073    | −0.073 |
|        | NA  | 7        | 2       | 2        | 4         | 2        | 3         | 2        | 2         | 2      |
|        | Ar  | 6.90     | 2.00    | 1.99     | 3.96      | 2.00     | 2.89      | 2.00     | 2.00      | 1.96   |
|        | PA  | 0        | 0       | 0        | 0         | 0        | 0         | 0        | 0         | 0      |
| E-PNT  | Ho  | 0.808    | 0.308   | 0.000    | 0.769     | 0.115    | 0.231     | 0.500    | 0.500     | 0.115  |
|        | He  | 0.717    | 0.260   | 0.142    | 0.676     | 0.174    | 0.322     | 0.464    | 0.375     | 0.109  |
|        | Fis | −0.126   | −0.182  | 1.000*** | −0.138    | 0.336    | 0.284***  | −0.078   | −0.333    | −0.061 |
|        | NA  | 4        | 2       | 2        | 4         | 2        | 2         | 1        | 3         | 1      |
|        | Ar  | 3.99     | 2.00    | 2.00     | 2.92      | 2.00     | 2.00      | 1.00     | 2.93      | 1.00   |
| E-CGB  | PA  | 0        | 0       | 0        | 0         | 0        | 0         | 0        | 0         | 0      |
|        | Ho  | 0.611    | 0.417   | 0.056    | 0.139     | 0.000    | 0.528     | 0.000    | 1.000     | 0.000  |
|        | He  | 0.700    | 0.389   | 0.444    | 0.132     | 0.198    | 0.497     | 0.000    | 0.549     | 0.000  |
|        | Fis | 0.127    | −0.072  | 0.875*** | −0.050    | 1.000*** | −0.063    | N.A.     | −0.820*** | N.A.   |
|        | NA  | 12       | 2       | 4        | 4         | 2        | 3         | 1        | 2         | 2      |
| E-BAC  | Ar  | 8.59     | 2.00    | 3.42     | 3.24      | 2.00     | 2.42      | 1.00     | 2.00      | 1.42   |
|        | PA  | 0        | 0       | 0        | 0         | 0        | 0         | 0        | 0         | 0      |
|        | Ho  | 0.732    | 0.341   | 0.146    | 0.195     | 0.171    | 0.415     | 0.000    | 0.976     | 0.024  |
|        | He  | 0.792    | 0.283   | 0.658    | 0.223     | 0.232    | 0.441     | 0.000    | 0.500     | 0.024  |
|        | Fis | 0.076    | −0.206  | 0.777*** | 0.124     | 0.265    | 0.059     | N.A.     | −0.952*** | −0.012 |
| E-SSB  | NA  | 5        | 1       | 2        | 4         | 1        | 3         | 1        | 2         | 1      |
|        | Ar  | 4.68     | 1.00    | 2.00     | 3.70      | 1.00     | 3.00      | 1.00     | 2.00      | 1.00   |
|        | PA  | 0        | 0       | 0        | 0         | 0        | 0         | 0        | 0         | 0      |
|        | Ho  | 0.400    | 0.000   | 0.000    | 0.400     | 0.000    | 0.650     | 0.000    | 0.900     | 0.000  |
|        | He  | 0.466    | 0.000   | 0.420    | 0.368     | 0.000    | 0.635     | 0.000    | 0.495     | 0.000  |
| E-BLM  | Fis | 0.142    | N.A.    | 1.000*** | −0.088*** | N.A.     | −0.024    | N.A.     | −0.818*** | N.A.   |
|        | NA  | 8        | 2       | 2        | 9         | 3        | 4         | 2        | 3         | 2      |
|        | Ar  | 7.53     | 2.00    | 2.00     | 7.44      | 2.63     | 3.91      | 1.92     | 3.00      | 1.92   |
|        | PA  | 0        | 0       | 0        | 0         | 0        | 0         | 0        | 0         | 0      |
|        | Ho  | 0.750    | 0.250   | 0.000    | 0.667     | 0.042    | 0.500     | 0.000    | 0.958     | 0.083  |
| P-HND  | He  | 0.787    | 0.278   | 0.375    | 0.574     | 0.119    | 0.595     | 0.080    | 0.609     | 0.080  |
|        | Fis | 0.047    | 0.100   | 1.000*** | −0.162    | 0.650*** | 0.159     | 1.000*** | −0.575*** | −0.043 |
|        | NA  | 6        | 2       | 2        | 8         | 1        | 3         | 1        | 2         | 1      |
|        | Ar  | 4.95     | 2.00    | 1.57     | 7.09      | 1.00     | 2.99      | 1.00     | 2.00      | 1.00   |
|        | PA  | 0        | 0       | 0        | 0         | 0        | 0         | 0        | 0         | 0      |
| P-PPB  | Ho  | 0.633    | 0.400   | 0.033    | 0.867     | 0.000    | 0.600     | 0.000    | 0.667     | 0.000  |
|        | He  | 0.641    | 0.444   | 0.033    | 0.770     | 0.000    | 0.572     | 0.000    | 0.498     | 0.000  |
|        | Fis | 0.011**  | 0.100   | −0.017   | −0.126    | N.A.     | −0.050    | N.A.     | −0.339    | N.A.   |
|        | NA  | 22       | 2       | 3        | 13        | 2        | 4         | 2        | 3         | 1      |
|        | Ar  | 15.60    | 2.00    | 3.00     | 9.68      | 2.00     | 3.28      | 1.45     | 2.42      | 1.00   |
| V-UNB  | PA  | 8        | 0       | 0        | 0         | 0        | 1         | 0        | 0         | 0      |
|        | Ho  | 0.921    | 0.395   | 0.026    | 0.763     | 0.263    | 0.553     | 0.026    | 0.184     | 0.000  |
|        | He  | 0.912    | 0.422   | 0.608    | 0.745     | 0.465    | 0.527     | 0.026    | 0.169     | 0.000  |
|        | Fis | −0.010   | 0.065   | 0.957*** | −0.024    | 0.435**  | −0.048*** | −0.013   | −0.088    | N.A.   |
|        | NA  | 2        | 2       | 1        | 3         | 1        | 3         | 2        | 1         | 1      |
| V-STN  | Ar  | −        | −       | −        | −         | −        | −         | −        | −         | −      |
|        | PA  | 0        | 0       | 0        | 0         | 0        | 0         | 0        | 0         | 0      |
|        | Ho  | −        | −       | −        | −         | −        | −         | −        | −         | −      |
|        | He  | −        | −       | −        | −         | −        | −         | −        | −         | −      |
|        | Fis | −        | −       | −        | −         | −        | −         | −        | −         | −      |
| V-SII  | NA  | 13       | 3       | 4        | 7         | 2        | 3         | 1        | 3         | 2      |
|        | Ar  | 10.82    | 2.52    | 3.78     | 5.59      | 2.00     | 3.00      | 1.00     | 2.53      | 1.96   |
|        | PA  | 0        | 0       | 0        | 0         | 0        | 0         | 0        | 0         | 0      |
|        | Ho  | 0.813    | 0.219   | 0.313    | 0.750     | 0.031    | 0.375     | 0.000    | 0.500     | 0.125  |
|        | He  | 0.859    | 0.198   | 0.629    | 0.686     | 0.195    | 0.631     | 0.000    | 0.480     | 0.117  |
| V-BTY  | Fis | 0.054    | −0.106  | 0.503*** | −0.094*** | 0.840*** | 0.406*    | N.A.     | −0.042    | −0.067 |
|        | NA  | 9        | 2       | 3        | 13        | 2        | 3         | 2        | 3         | 2      |
|        | Ar  | 7.64     | 2.00    | 2.88     | 10.08     | 1.75     | 2.94      | 1.99     | 3.00      | 2.00   |
|        | PA  | 0        | 0       | 0        | 0         | 0        | 0         | 0        | 0         | 0      |
|        | Ho  | 0.824    | 0.206   | 0.029    | 0.765     | 0.059    | 0.382     | 0.206    | 0.824     | 0.265  |
| G = 32 | He  | 0.797    | 0.271   | 0.502    | 0.792     | 0.057    | 0.443     | 0.185    | 0.625     | 0.230  |
|        | Fis | −0.033   | 0.241   | 0.941*** | 0.034     | −0.030   | 0.137     | −0.115   | −0.319*** | −0.153 |
|        | NA  | 10       | 2       | 4        | 7         | 2        | 4         | 2        | 3         | 2      |
|        | Ar  | 8.92     | 2.00    | 3.92     | 5.57      | 1.46     | 3.42      | 1.85     | 2.46      | 1.98   |
|        | PA  | 0        | 0       | 0        | 0         | 0        | 0         | 0        | 0         | 0      |
| G = 36 | Ho  | 0.865    | 0.108   | 0.135    | 0.432     | 0.027    | 0.351     | 0.081    | 0.649     | 0.162  |
|        | He  | 0.855    | 0.193   | 0.545    | 0.558     | 0.027    | 0.396     | 0.078    | 0.447     | 0.149  |
|        | Fis | −0.012** | 0.439** | 0.752*** | 0.225     | −0.014   | 0.113     | −0.042   | −0.452*   | −0.088 |
|        | NA  | 6        | 3       | 3        | 8         | 1        | 4         | 2        | 3         | 3      |
|        | Ar  | 5.70     | 2.42    | 2.99     | 6.13      | 1.00     | 2.79      | 1.40     | 2.93      | 2.76   |
| G = 43 | PA  | 0        | 0       | 0        | 0         | 0        | 0         | 0        | 0         | 1      |
|        | Ho  | 0.488    | 0.070   | 0.000    | 0.651     | 0.000    | 0.465     | 0.023    | 0.744     | 0.186  |

|                        |                       |          |          |          |         |          |         |        |           |          |
|------------------------|-----------------------|----------|----------|----------|---------|----------|---------|--------|-----------|----------|
| <b>V-ALB</b><br>G = 41 | <i>H<sub>E</sub></i>  | 0.688    | 0.111    | 0.411    | 0.643   | 0.000    | 0.470   | 0.023  | 0.511     | 0.211    |
|                        | <i>F<sub>IS</sub></i> | 0.290*** | 0.372*** | 1.000*** | -0.013  | N.A.     | 0.010   | -0.012 | -0.457**  | 0.119    |
|                        | <i>N<sub>A</sub></i>  | 10       | 3        | 3        | 13      | 2        | 2       | 1      | 3         | 2        |
|                        | <i>A<sub>R</sub></i>  | 7.84     | 2.42     | 2.66     | 8.33    | 1.81     | 2.00    | 1.00   | 2.94      | 2.00     |
|                        | <i>P<sub>A</sub></i>  | 0        | 0        | 0        | 0       | 0        | 0       | 0      | 0         | 0        |
| <b>V-PAB</b><br>G = 37 | <i>H<sub>O</sub></i>  | 0.756    | 0.488    | 0.000    | 0.659   | 0.024    | 0.341   | 0.000  | 0.707     | 0.390    |
|                        | <i>H<sub>E</sub></i>  | 0.781    | 0.441    | 0.522    | 0.682   | 0.070    | 0.493   | 0.000  | 0.534     | 0.343    |
|                        | <i>F<sub>IS</sub></i> | 0.032    | -0.107   | 1.000*** | 0.035** | 0.654*** | 0.307*  | N.A.   | -0.325*   | -0.139   |
|                        | <i>N<sub>A</sub></i>  | 12       | 3        | 3        | 9       | 2        | 3       | 2      | 3         | 2        |
|                        | <i>A<sub>R</sub></i>  | 9.29     | 2.71     | 3.00     | 7.18    | 2.00     | 2.99    | 1.46   | 2.96      | 2.00     |
| <b>V-TCL</b><br>G = 22 | <i>P<sub>A</sub></i>  | 0        | 0        | 0        | 0       | 0        | 0       | 1      | 0         | 0        |
|                        | <i>H<sub>O</sub></i>  | 0.703    | 0.432    | 0.135    | 0.838   | 0.054    | 0.405   | 0.027  | 0.649     | 0.514    |
|                        | <i>H<sub>E</sub></i>  | 0.812    | 0.349    | 0.489    | 0.738   | 0.497    | 0.456   | 0.027  | 0.561     | 0.428    |
|                        | <i>F<sub>IS</sub></i> | 0.135    | -0.238   | 0.724*** | -0.135  | 0.891*** | 0.111   | -0.014 | -0.157    | -0.199   |
|                        | <i>N<sub>A</sub></i>  | 3        | 2        | 1        | 1       | 1        | 3       | 1      | 2         | 1        |
| <b>V-GUI</b><br>G = 36 | <i>A<sub>R</sub></i>  | 2.77     | 2.00     | 1.00     | 1.00    | 1.00     | 2.77    | 1.00   | 2.00      | 1.00     |
|                        | <i>P<sub>A</sub></i>  | 0        | 0        | 0        | 0       | 0        | 0       | 0      | 0         | 0        |
|                        | <i>H<sub>O</sub></i>  | 0.273    | 0.273    | 0.000    | 0.000   | 0.000    | 0.227   | 0.000  | 0.773     | 0.000    |
|                        | <i>H<sub>E</sub></i>  | 0.274    | 0.351    | 0.000    | 0.000   | 0.000    | 0.206   | 0.000  | 0.474     | 0.000    |
|                        | <i>F<sub>IS</sub></i> | 0.004    | 0.224    | N.A.     | N.A.    | N.A.     | -0.106  | N.A.   | -0.630**  | N.A.     |
| <b>M-OPL</b><br>G = 30 | <i>N<sub>A</sub></i>  | 6        | 2        | 2        | 4       | 1        | 5       | 2      | 2         | 1        |
|                        | <i>A<sub>R</sub></i>  | 5.65     | 2.00     | 2.00     | 3.73    | 1.00     | 4.19    | 2.00   | 2.00      | 1.00     |
|                        | <i>P<sub>A</sub></i>  | 0        | 0        | 0        | 0       | 0        | 0       | 1      | 0         | 0        |
|                        | <i>H<sub>O</sub></i>  | 0.611    | 0.500    | 0.139    | 0.611   | 0.000    | 0.500   | 0.611  | 0.500     | 0.000    |
|                        | <i>H<sub>E</sub></i>  | 0.681    | 0.444    | 0.435    | 0.665   | 0.000    | 0.449   | 0.498  | 0.401     | 0.000    |
| <b>M-LGD</b><br>G = 31 | <i>F<sub>IS</sub></i> | 0.102    | -0.125   | 0.681*** | 0.081   | N.A.     | -0.112  | -0.226 | -0.246    | N.A.     |
|                        | <i>N<sub>A</sub></i>  | 9        | 2        | 4        | 2       | 2        | 2       | 1      | 2         | 2        |
|                        | <i>A<sub>R</sub></i>  | 6.65     | 2.00     | 3.82     | 2.00    | 1.92     | 1.82    | 1.00   | 2.00      | 2.00     |
|                        | <i>P<sub>A</sub></i>  | 0        | 0        | 0        | 0       | 0        | 0       | 0      | 0         | 0        |
|                        | <i>H<sub>O</sub></i>  | 0.700    | 0.433    | 0.067    | 0.467   | 0.033    | 0.067   | 0.000  | 1.000     | 0.400    |
| <b>M-RIZ</b><br>G = 31 | <i>H<sub>E</sub></i>  | 0.707    | 0.473    | 0.651    | 0.420   | 0.095    | 0.064   | 0.000  | 0.500     | 0.391    |
|                        | <i>F<sub>IS</sub></i> | 0.010*** | 0.083    | 0.898*** | -0.111  | 0.649*** | -0.034  | N.A.   | -1.000*** | -0.023   |
|                        | <i>N<sub>A</sub></i>  | 9        | 3        | 4        | 11      | 4        | 2       | 2      | 4         | 2        |
|                        | <i>A<sub>R</sub></i>  | 6.99     | 2.80     | 3.55     | 8.93    | 3.96     | 2.00    | 1.55   | 3.35      | 2.00     |
|                        | <i>P<sub>A</sub></i>  | 0        | 0        | 0        | 1       | 0        | 0       | 1      | 0         | 0        |
| <b>M-BAT</b><br>G = 17 | <i>H<sub>O</sub></i>  | 0.613    | 0.323    | 0.355    | 0.935   | 0.290    | 0.387   | 0.032  | 1.000     | 0.258    |
|                        | <i>H<sub>E</sub></i>  | 0.704    | 0.323    | 0.541    | 0.806   | 0.637    | 0.350   | 0.032  | 0.545     | 0.271    |
|                        | <i>F<sub>IS</sub></i> | 0.130*** | 0.000    | 0.344*   | -0.16   | 0.544*** | -0.107  | -0.016 | -0.836*** | 0.046    |
|                        | <i>N<sub>A</sub></i>  | 9        | 4        | 5        | 10      | 2        | 3       | 2      | 3         | 2        |
|                        | <i>A<sub>R</sub></i>  | 7.95     | 3.76     | 4.01     | 8.82    | 1.91     | 2.55    | 1.55   | 3.00      | 1.99     |
| <b>M-SAG</b><br>G = 22 | <i>P<sub>A</sub></i>  | 0        | 1        | 0        | 0       | 0        | 0       | 0      | 0         | 0        |
|                        | <i>H<sub>O</sub></i>  | 0.548    | 0.097    | 0.194    | 0.581   | 0.097    | 0.742   | 0.032  | 0.968     | 0.194    |
|                        | <i>H<sub>E</sub></i>  | 0.739    | 0.335    | 0.564    | 0.796   | 0.092    | 0.505   | 0.032  | 0.608     | 0.175    |
|                        | <i>F<sub>IS</sub></i> | 0.258    | 0.711*** | 0.657**  | 0.271** | -0.050   | -0.469* | -0.016 | -0.591*** | -0.107   |
|                        | <i>N<sub>A</sub></i>  | 5        | 2        | 2        | 6       | 2        | 2       | 1      | 2         | 2        |
| <b>M-SAG</b><br>G = 22 | <i>A<sub>R</sub></i>  | 5.00     | 2.00     | 2.00     | 6.00    | 2.00     | 2.00    | 1.00   | 2.00      | 2.00     |
|                        | <i>P<sub>A</sub></i>  | 0        | 0        | 0        | 0       | 0        | 0       | 0      | 0         | 0        |
|                        | <i>H<sub>O</sub></i>  | 0.824    | 0.529    | 0.059    | 0.941   | 0.059    | 0.529   | 0.000  | 0.471     | 0.824    |
|                        | <i>H<sub>E</sub></i>  | 0.715    | 0.389    | 0.327    | 0.785   | 0.057    | 0.493   | 0.000  | 0.498     | 0.484    |
|                        | <i>F<sub>IS</sub></i> | -0.153*  | -0.360   | 0.820*** | -0.198  | -0.030   | -0.074  | N.A.   | 0.056     | -0.700** |
| <b>M-SAG</b><br>G = 22 | <i>N<sub>A</sub></i>  | 9        | 2        | 2        | 7       | 1        | 4       | 2      | 3         | 2        |
|                        | <i>A<sub>R</sub></i>  | 8.31     | 1.95     | 2.00     | 6.93    | 1.00     | 3.77    | 1.95   | 3.00      | 1.77     |
|                        | <i>P<sub>A</sub></i>  | 0        | 0        | 0        | 0       | 0        | 0       | 1      | 0         | 0        |
|                        | <i>H<sub>O</sub></i>  | 0.773    | 0.091    | 0.000    | 0.727   | 0.000    | 0.682   | 0.091  | 0.818     | 0.045    |
|                        | <i>H<sub>E</sub></i>  | 0.782    | 0.087    | 0.351    | 0.736   | 0.000    | 0.588   | 0.087  | 0.642     | 0.044    |
| <b>M-SAG</b><br>G = 22 | <i>F<sub>IS</sub></i> | 0.012    | -0.048   | 1.000*** | 0.011   | N.A.     | -0.160  | -0.048 | -0.275*** | -0.023   |

G is the number of multilocus genotypes, including identical genotypes resulting from sexual reproduction by chance. *N<sub>A</sub>* is the number of alleles. *A<sub>R</sub>* is allelic richness. *P<sub>A</sub>* is the number of private alleles. *H<sub>O</sub>* and *H<sub>E</sub>* are observed and expected heterozygosities. *F<sub>IS</sub>* is the inbreeding coefficient. The probability of deviation from Hardy-Weinberg equilibrium was calculated in *F<sub>IS</sub>* (\**P* < 0.05, \*\**P* < 0.01, \*\*\**P* < 0.001).

**Table S2.** Characteristics of nine polymorphic microsatellite loci used in this study: locus name, repeat motif, forward and reverse primer sequences, allele size range, combination of loci for multiplex PCR, fluorescent label and GenBank accession number.

| Locus    | Repeat motif  | Forward primer sequence (5'-3') | Reverse primer sequence (5'-3') | Size range (bp) | Multiplex (fluorescent) | Accession No. |
|----------|---------------|---------------------------------|---------------------------------|-----------------|-------------------------|---------------|
| Themp030 | (AC)6(AG)13   | ACACACACACACAGAGAGAGAG          | ACAAGTGCTGCAGGGATGACA           | 94–165          | A (NED)                 | AB688099      |
| Themp041 | (AC)8(TC)6    | AATTCGTGGATGCCTCGCTT            | U19-ATTCTTAAGGAGAGGTCATGG       | 368–377         | A (FAM)                 | AB688100      |
| Themp047 | (AC)6(AG)5    | ACACACACACACAGAGAGAGAG          | CATCTTATGATCCATCCATGTGG         | 113–121         | B (FAM)                 | AB688101      |
| Themp048 | (AC)6(AG)13   | ACACACACACACAGAGAGAGAG          | CAACAATTCATTCACCTCCTCCC         | 147–199         | B (FAM)                 | AB688102      |
| Themp049 | (AC)6(AG)7    | ACACACACACACAGAGAGAGAG          | CCACGTGATTGTTAGTATAGG           | 255–261         | B (FAM)                 | AB688103      |
| Themp066 | (AC)9AT(AG)14 | GTGCGATGGAAAGAGTAGAC            | U19-TCTATATTCAGAGTACGTGCC       | 284–306         | A (FAM)                 | AB688104      |
| Themp103 | (AC)6(AG)10   | ACACACACACACAGAGAGAGAG          | GTCCTACACGTTGTAGTCATCG          | 93–127          | C (VIC)                 | AB688105      |
| Themp107 | (AC)6(AG)6    | ACACACACACACAGAGAGAGAG          | TCAACGCCTTTGGTGACATCC           | 140–146         | C (VIC)                 | AB688106      |
| Themp193 | (AC)8         | AAGTCAGGTGCTACGAGAGTG           | U19-CACAGTGGGTCTTTTTCCTTG       | 144–154         | A (FAM)                 | AB688107      |

Details of primers are provided in Matsuki et al. [32].

Table S3. Pairwise  $F_{ST}$  values (below diagonal) and geographic distance (km) (above diagonal) between sites.

|       | B-<br>CNR | B-<br>NLP | N-<br>TPL | N-<br>BYG | W-<br>AND | W-<br>SAN | W-<br>ILM | W-<br>CMY | W-<br>MOR | D-<br>BLT | D-<br>MCH | D-<br>HNR | D-<br>LMB | E-<br>PNT | E-<br>CGB | E-<br>BAC | E-<br>SSB | E-<br>BLM | P-<br>HND | V-<br>UNB | V-<br>STN | V-<br>SII | V-<br>BTY | V-<br>ALB | V-<br>PAB | V-<br>TCL | V-<br>GUI | M-<br>OPL | M-<br>LGD | M-<br>RIZ | M-<br>BAT | M-<br>SAG |
|-------|-----------|-----------|-----------|-----------|-----------|-----------|-----------|-----------|-----------|-----------|-----------|-----------|-----------|-----------|-----------|-----------|-----------|-----------|-----------|-----------|-----------|-----------|-----------|-----------|-----------|-----------|-----------|-----------|-----------|-----------|-----------|-----------|
| B-CNR |           | 15.1      | 236.8     | 256.6     | 501.6     | 493.2     | 507.1     | 656.0     | 665.8     | 778.0     | 776.6     | 779.0     | 786.5     | 521.4     | 687.5     | 852.2     | 897.5     | 762.1     | 1229.9    | 945.3     | 1116.9    | 1270.1    | 1243.2    | 1226.1    | 1152.1    | 1072.2    | 1129.8    | 1353.9    | 1341.0    | 1324.2    | 1561.6    | 1587.1    |
| B-NLP | 0.245     |           | 224.5     | 241.5     | 486.7     | 478.2     | 492.1     | 641.6     | 651.4     | 764.3     | 763.0     | 765.3     | 772.9     | 508.2     | 674.7     | 842.3     | 887.4     | 750.6     | 1215.4    | 932.7     | 1104.7    | 1258.3    | 1231.6    | 1214.9    | 1141.3    | 1062.7    | 1121.1    | 1343.3    | 1330.3    | 1312.7    | 1551.4    | 1576.9    |
| N-TPL | 0.371     | 0.349     |           | 152.7     | 307.5     | 303.4     | 320.0     | 437.1     | 445.9     | 546.3     | 544.8     | 547.1     | 553.9     | 287.0     | 451.2     | 624.8     | 669.2     | 526.8     | 1007.9    | 708.7     | 880.2     | 1034.0    | 1007.6    | 991.9     | 919.3     | 847.7     | 911.2     | 1122.0    | 1108.7    | 1088.9    | 1331.4    | 1357.0    |
| N-BYG | 0.132     | 0.163     | 0.306     |           | 252.2     | 242.1     | 254.5     | 418.9     | 429.4     | 558.3     | 557.3     | 559.7     | 569.2     | 324.5     | 492.1     | 712.8     | 754.5     | 593.4     | 988.0     | 746.6     | 925.4     | 1085.8    | 1062.6    | 1054.3    | 988.0     | 936.9     | 1008.6    | 1191.2    | 1177.1    | 1145.1    | 1403.6    | 1429.4    |
| W-AND | 0.133     | 0.171     | 0.278     | 0.083     |           | 13.7      | 21.7      | 174.8     | 185.7     | 328.0     | 327.6     | 330.0     | 341.2     | 180.2     | 301.4     | 567.6     | 601.5     | 425.6     | 736.2     | 531.1     | 711.2     | 874.7     | 855.4     | 855.9     | 799.1     | 780.4     | 863.4     | 998.2     | 983.2     | 937.5     | 1210.6    | 1236.2    |
| W-SAN | 0.132     | 0.148     | 0.274     | 0.071     | 0.026     |           | 17.1      | 187.7     | 198.6     | 341.4     | 341.1     | 343.4     | 354.8     | 190.5     | 314.7     | 580.2     | 614.4     | 438.6     | 747.0     | 544.7     | 724.8     | 888.4     | 869.0     | 869.6     | 812.7     | 793.4     | 876.3     | 1011.8    | 996.8     | 951.1     | 1224.2    | 1249.9    |
| W-ILM | 0.128     | 0.171     | 0.319     | 0.086     | 0.033     | 0.073     |           | 182.9     | 193.9     | 338.8     | 338.5     | 340.9     | 352.5     | 201.6     | 318.6     | 586.7     | 620.0     | 443.9     | 736.5     | 543.6     | 723.3     | 887.0     | 868.2     | 869.9     | 814.2     | 798.2     | 881.8     | 1012.5    | 997.4     | 950.2     | 1224.7    | 1250.3    |
| W-CMY | 0.350     | 0.286     | 0.491     | 0.318     | 0.216     | 0.248     | 0.233     |           | 10.9      | 158.0     | 158.1     | 160.4     | 172.6     | 181.7     | 179.6     | 453.4     | 478.7     | 305.8     | 573.9     | 365.3     | 543.5     | 707.2     | 689.8     | 694.9     | 644.4     | 647.1     | 735.4     | 838.5     | 823.2     | 771.2     | 1049.5    | 1074.9    |
| W-MOR | 0.352     | 0.315     | 0.480     | 0.331     | 0.203     | 0.226     | 0.222     | 0.106     |           | 147.6     | 147.7     | 150.0     | 162.2     | 186.8     | 174.4     | 447.0     | 471.7     | 299.6     | 564.3     | 355.0     | 533.0     | 696.7     | 679.5     | 684.8     | 634.7     | 639.1     | 727.6     | 828.5     | 813.2     | 760.7     | 1039.3    | 1064.8    |
| D-BLT | 0.325     | 0.262     | 0.470     | 0.257     | 0.159     | 0.145     | 0.196     | 0.160     | 0.155     |           | 2.5       | 2.9       | 15.5      | 260.3     | 127.7     | 341.9     | 356.4     | 206.1     | 473.9     | 207.6     | 385.5     | 549.3     | 531.9     | 537.9     | 490.6     | 509.1     | 600.2     | 681.8     | 666.5     | 613.2     | 892.2     | 917.6     |
| D-MCH | 0.281     | 0.209     | 0.458     | 0.267     | 0.183     | 0.202     | 0.186     | 0.175     | 0.196     | 0.217     |           | 2.4       | 14.7      | 258.6     | 125.3     | 339.8     | 354.5     | 203.8     | 475.9     | 207.3     | 385.5     | 549.2     | 531.7     | 537.5     | 489.8     | 507.7     | 598.7     | 681.4     | 666.0     | 613.1     | 891.8     | 917.2     |
| D-HNR | 0.568     | 0.386     | 0.667     | 0.513     | 0.423     | 0.433     | 0.440     | 0.370     | 0.469     | 0.437     | 0.429     |           | 12.7      | 260.8     | 126.6     | 339.1     | 353.5     | 203.7     | 474.1     | 205.1     | 383.2     | 547.0     | 529.5     | 535.4     | 487.8     | 506.2     | 597.3     | 679.3     | 663.9     | 610.8     | 889.7     | 915.1     |
| D-LMB | 0.469     | 0.374     | 0.567     | 0.441     | 0.315     | 0.340     | 0.342     | 0.201     | 0.238     | 0.290     | 0.310     | 0.522     |           | 267.2     | 126.3     | 328.8     | 342.4     | 195.4     | 471.3     | 192.8     | 371.2     | 535.0     | 517.3     | 522.9     | 475.1     | 493.9     | 585.0     | 666.7     | 651.4     | 598.7     | 877.2     | 902.6     |
| E-PNT | 0.429     | 0.299     | 0.537     | 0.355     | 0.289     | 0.290     | 0.314     | 0.342     | 0.366     | 0.381     | 0.300     | 0.395     | 0.466     |           | 169.3     | 402.2     | 440.4     | 271.4     | 728.9     | 427.2     | 603.6     | 762.5     | 738.6     | 729.8     | 664.0     | 622.7     | 700.7     | 867.1     | 852.9     | 821.0     | 1079.7    | 1105.5    |
| E-CGB | 0.455     | 0.276     | 0.552     | 0.381     | 0.327     | 0.301     | 0.352     | 0.315     | 0.368     | 0.343     | 0.326     | 0.323     | 0.440     | 0.081     |           | 275.6     | 304.4     | 128.4     | 595.9     | 258.3     | 434.3     | 593.8     | 570.6     | 564.1     | 501.9     | 480.0     | 565.0     | 703.7     | 689.1     | 653.1     | 916.5     | 942.3     |
| E-BAC | 0.546     | 0.341     | 0.632     | 0.443     | 0.355     | 0.343     | 0.381     | 0.392     | 0.420     | 0.412     | 0.405     | 0.421     | 0.516     | 0.102     | 0.093     |           | 45.8      | 147.6     | 678.8     | 258.1     | 337.4     | 452.0     | 420.0     | 389.3     | 309.1     | 224.4     | 298.5     | 505.0     | 493.1     | 493.7     | 709.9     | 735.3     |
| E-SSB | 0.411     | 0.224     | 0.517     | 0.305     | 0.232     | 0.197     | 0.271     | 0.236     | 0.266     | 0.210     | 0.271     | 0.325     | 0.351     | 0.149     | 0.086     | 0.116     |           | 176.5     | 660.2     | 244.3     | 301.3     | 408.8     | 376.4     | 344.3     | 263.7     | 182.7     | 261.9     | 459.2     | 447.2     | 449.0     | 664.4     | 689.8     |
| E-BLM | 0.441     | 0.317     | 0.575     | 0.388     | 0.255     | 0.302     | 0.289     | 0.261     | 0.329     | 0.335     | 0.307     | 0.317     | 0.436     | 0.251     | 0.278     | 0.311     | 0.263     |           | 613.8     | 211.3     | 360.6     | 508.4     | 481.2     | 465.5     | 395.4     | 355.0     | 438.0     | 598.9     | 585.1     | 562.1     | 810.6     | 836.4     |
| P-HND | 0.260     | 0.175     | 0.404     | 0.189     | 0.105     | 0.092     | 0.136     | 0.180     | 0.194     | 0.121     | 0.218     | 0.349     | 0.273     | 0.242     | 0.215     | 0.278     | 0.135     | 0.224     |           | 421.3     | 415.5     | 487.6     | 501.2     | 549.2     | 573.3     | 701.0     | 780.9     | 653.4     | 640.0     | 541.0     | 802.8     | 822.0     |
| V-UNB | 0.383     | 0.198     | 0.482     | 0.272     | 0.234     | 0.202     | 0.250     | 0.254     | 0.297     | 0.230     | 0.266     | 0.237     | 0.351     | 0.177     | 0.114     | 0.144     | 0.047     | 0.239     | 0.136     |           | 180.3     | 343.7     | 324.8     | 330.7     | 288.6     | 340.6     | 432.5     | 474.7     | 459.3     | 406.6     | 684.6     | 710.0     |
| V-STN | 0.429     | 0.260     | 0.507     | 0.334     | 0.275     | 0.268     | 0.299     | 0.285     | 0.329     | 0.298     | 0.311     | 0.288     | 0.415     | 0.205     | 0.175     | 0.149     | 0.133     | 0.197     | 0.204     | 0.104     |           | 163.8     | 148.0     | 167.3     | 161.5     | 288.4     | 365.5     | 307.9     | 292.2     | 227.9     | 511.6     | 536.5     |
| V-SII | 0.462     | 0.281     | 0.553     | 0.404     | 0.347     | 0.312     | 0.370     | 0.351     | 0.379     | 0.352     | 0.355     | 0.370     | 0.437     | 0.271     | 0.192     | 0.259     | 0.162     | 0.368     | 0.274     | 0.157     | 0.214     |           | 34.1      | 86.4      | 160.7     | 316.6     | 360.0     | 168.1     | 153.8     | 66.1      | 354.2     | 378.3     |
| V-BTY | 0.455     | 0.322     | 0.553     | 0.404     | 0.314     | 0.309     | 0.337     | 0.394     | 0.393     | 0.396     | 0.380     | 0.396     | 0.475     | 0.225     | 0.236     | 0.220     | 0.221     | 0.292     | 0.281     | 0.203     | 0.191     | 0.130     |           | 55.7      | 126.7     | 282.9     | 328.6     | 165.2     | 149.8     | 82.6      | 363.8     | 388.6     |
| V-ALB | 0.374     | 0.237     | 0.481     | 0.296     | 0.220     | 0.205     | 0.255     | 0.216     | 0.259     | 0.221     | 0.259     | 0.233     | 0.345     | 0.168     | 0.127     | 0.177     | 0.071     | 0.159     | 0.126     | 0.078     | 0.130     | 0.192     | 0.196     |           | 82.4      | 232.8     | 273.6     | 144.1     | 128.6     | 105.4     | 354.9     | 380.5     |
| V-PAB | 0.352     | 0.173     | 0.450     | 0.281     | 0.189     | 0.198     | 0.216     | 0.262     | 0.264     | 0.265     | 0.249     | 0.329     | 0.343     | 0.196     | 0.204     | 0.225     | 0.165     | 0.188     | 0.124     | 0.154     | 0.170     | 0.265     | 0.220     | 0.127     |           | 157.3     | 214.8     | 203.5     | 189.7     | 187.8     | 415.6     | 441.4     |
| V-TCL | 0.634     | 0.483     | 0.744     | 0.629     | 0.474     | 0.494     | 0.484     | 0.490     | 0.503     | 0.563     | 0.519     | 0.589     | 0.599     | 0.349     | 0.369     | 0.420     | 0.410     | 0.440     | 0.423     | 0.378     | 0.339     | 0.283     | 0.127     | 0.354     | 0.368     |           | 92.4      | 306.7     | 298.0     | 332.8     | 497.5     | 522.2     |
| V-GUI | 0.440     | 0.318     | 0.520     | 0.401     | 0.352     | 0.362     | 0.366     | 0.381     | 0.437     | 0.437     | 0.358     | 0.398     | 0.485     | 0.312     | 0.311     | 0.355     | 0.315     | 0.358     | 0.349     | 0.294     | 0.282     | 0.222     | 0.238     | 0.299     | 0.331     | 0.333     |           | 304.0     | 299.6     | 359.9     | 467.2     | 490.1     |
| M-OPL | 0.452     | 0.306     | 0.537     | 0.379     | 0.293     | 0.284     | 0.323     | 0.355     | 0.343     | 0.350     | 0.310     | 0.386     | 0.449     | 0.215     | 0.228     | 0.260     | 0.211     | 0.314     | 0.267     | 0.208     | 0.244     | 0.255     | 0.232     | 0.185     | 0.183     | 0.429     | 0.359     |           | 15.7      | 113.5     | 212.9     | 238.6     |
| M-LGD | 0.401     | 0.233     | 0.486     | 0.321     | 0.235     | 0.236     | 0.264     | 0.300     | 0.308     | 0.298     | 0.266     | 0.294     | 0.358     | 0.160     | 0.178     | 0.195     | 0.156     | 0.212     | 0.179     | 0.152     | 0.170     | 0.236     | 0.181     | 0.122     | 0.089     | 0.362     | 0.307     | 0.107     |           | 101.7     | 227.6     | 253.3     |
| M-RIZ | 0.377     | 0.205     | 0.475     | 0.279     | 0.224     | 0.190     | 0.255     | 0.252     | 0.297     | 0.226     | 0.282     | 0.224     | 0.371     | 0.178     | 0.108     | 0.160     | 0.072     | 0.176     | 0.122     | 0.062     | 0.110     | 0.180     | 0.187     | 0.034     | 0.129     | 0.380     | 0.296     | 0.172     | 0.100     |           | 288.2     | 312.2     |
| M-BAT | 0.421     | 0.215     | 0.522     | 0.303     | 0.232     | 0.217     | 0.269     | 0.211     | 0.267     | 0.211     | 0.289     | 0.324     | 0.343     | 0.292     | 0.233     | 0.300     | 0.103     | 0.284     | 0.172     | 0.112     | 0.187     | 0.232     | 0.292     | 0.095     | 0.184     | 0.511     | 0.356     | 0.266     | 0.195     | 0.117     |           | 25.8      |
| M-SAG | 0.415     | 0.222     | 0.502     | 0.289     | 0.229     | 0.197     | 0.264     | 0.269     | 0.318     | 0.215     | 0.323     | 0.353     | 0.390     | 0.279     | 0.210     | 0.249     | 0.089     | 0.314     | 0.171     | 0.103     | 0.166     | 0.208     | 0.257     | 0.126     | 0.212     | 0.491     | 0.327     | 0.271     | 0.187     | 0.110     | 0.078     |           |

All  $P_s$  = 0.001 in pairwise  $F_{ST}$ . P-PPB was removed due to the low sample size after removal of clonal replicates.

Table S4. Pairwise migration rates for 32 sites using BayesAss.

| In    | From  |       |       |       |       |       |       |       |       |       |       |       |       |       |       |       |       |       |       |       |       |       |       |       |       |       |       |       |       |       |       |       |       |
|-------|-------|-------|-------|-------|-------|-------|-------|-------|-------|-------|-------|-------|-------|-------|-------|-------|-------|-------|-------|-------|-------|-------|-------|-------|-------|-------|-------|-------|-------|-------|-------|-------|-------|
|       | B-CNR | B-NLP | N-TPL | N-BYG | W-AND | W-SAN | W-ILM | W-CMY | W-MOR | D-BLT | D-MCH | D-HNR | D-LMB | E-PNT | E-CGB | E-BAC | E-SSB | E-BLM | P-HND | V-UNB | V-STN | V-SII | V-BTY | V-ALB | V-PAB | V-TCL | V-GUI | M-OPL | M-LGD | M-RIZ | M-BAT | M-SAG |       |
| B-CNR | 0.843 | 0.005 | 0.006 | 0.005 | 0.005 | 0.007 | 0.006 | 0.005 | 0.005 | 0.005 | 0.005 | 0.005 | 0.005 | 0.005 | 0.005 | 0.005 | 0.005 | 0.005 | 0.005 | 0.005 | 0.005 | 0.005 | 0.005 | 0.005 | 0.005 | 0.005 | 0.005 | 0.005 | 0.005 | 0.005 | 0.005 | 0.005 |       |
| B-NLP | 0.011 | 0.841 | 0.005 | 0.005 | 0.005 | 0.006 | 0.006 | 0.005 | 0.006 | 0.006 | 0.006 | 0.004 | 0.005 | 0.007 | 0.005 | 0.004 | 0.005 | 0.005 | 0.005 | 0.005 | 0.005 | 0.005 | 0.005 | 0.005 | 0.005 | 0.005 | 0.005 | 0.005 | 0.005 | 0.005 | 0.005 | 0.004 | 0.005 |
| N-TPL | 0.019 | 0.006 | 0.815 | 0.005 | 0.005 | 0.010 | 0.006 | 0.005 | 0.006 | 0.006 | 0.006 | 0.005 | 0.005 | 0.006 | 0.005 | 0.005 | 0.006 | 0.006 | 0.005 | 0.005 | 0.005 | 0.005 | 0.005 | 0.005 | 0.005 | 0.005 | 0.005 | 0.005 | 0.005 | 0.005 | 0.005 | 0.005 | 0.005 |
| N-BYG | 0.113 | 0.007 | 0.007 | 0.674 | 0.007 | 0.011 | 0.017 | 0.007 | 0.007 | 0.007 | 0.007 | 0.007 | 0.006 | 0.007 | 0.006 | 0.007 | 0.007 | 0.006 | 0.007 | 0.006 | 0.007 | 0.006 | 0.007 | 0.007 | 0.007 | 0.007 | 0.006 | 0.007 | 0.006 | 0.006 | 0.006 | 0.006 | 0.008 |
| W-AND | 0.011 | 0.005 | 0.006 | 0.004 | 0.672 | 0.183 | 0.010 | 0.004 | 0.005 | 0.004 | 0.004 | 0.004 | 0.005 | 0.004 | 0.005 | 0.004 | 0.005 | 0.004 | 0.004 | 0.004 | 0.004 | 0.004 | 0.005 | 0.004 | 0.004 | 0.004 | 0.005 | 0.004 | 0.004 | 0.005 | 0.004 | 0.004 | 0.004 |
| W-SAN | 0.028 | 0.006 | 0.007 | 0.005 | 0.005 | 0.807 | 0.008 | 0.005 | 0.005 | 0.006 | 0.007 | 0.005 | 0.005 | 0.005 | 0.005 | 0.005 | 0.005 | 0.005 | 0.008 | 0.005 | 0.005 | 0.005 | 0.006 | 0.010 | 0.005 | 0.005 | 0.005 | 0.005 | 0.005 | 0.005 | 0.005 | 0.005 | 0.008 |
| W-ILM | 0.056 | 0.005 | 0.006 | 0.005 | 0.005 | 0.014 | 0.785 | 0.006 | 0.006 | 0.007 | 0.011 | 0.005 | 0.005 | 0.005 | 0.005 | 0.004 | 0.004 | 0.005 | 0.005 | 0.005 | 0.005 | 0.005 | 0.005 | 0.005 | 0.004 | 0.005 | 0.004 | 0.004 | 0.005 | 0.004 | 0.004 | 0.004 | 0.005 |
| W-CMY | 0.005 | 0.005 | 0.005 | 0.004 | 0.005 | 0.005 | 0.005 | 0.823 | 0.022 | 0.007 | 0.008 | 0.005 | 0.006 | 0.005 | 0.005 | 0.005 | 0.005 | 0.005 | 0.005 | 0.005 | 0.005 | 0.005 | 0.005 | 0.005 | 0.005 | 0.005 | 0.005 | 0.005 | 0.005 | 0.005 | 0.005 | 0.005 | 0.008 |
| W-MOR | 0.005 | 0.006 | 0.004 | 0.004 | 0.004 | 0.005 | 0.005 | 0.006 | 0.853 | 0.005 | 0.006 | 0.004 | 0.005 | 0.005 | 0.004 | 0.004 | 0.004 | 0.005 | 0.005 | 0.005 | 0.004 | 0.005 | 0.007 | 0.005 | 0.005 | 0.004 | 0.004 | 0.005 | 0.004 | 0.004 | 0.005 | 0.005 | 0.005 |
| D-BLT | 0.005 | 0.005 | 0.005 | 0.005 | 0.005 | 0.006 | 0.005 | 0.006 | 0.009 | 0.835 | 0.010 | 0.005 | 0.005 | 0.005 | 0.005 | 0.005 | 0.005 | 0.005 | 0.005 | 0.004 | 0.005 | 0.005 | 0.005 | 0.006 | 0.005 | 0.005 | 0.005 | 0.005 | 0.005 | 0.005 | 0.005 | 0.005 | 0.005 |
| D-MCH | 0.006 | 0.005 | 0.005 | 0.005 | 0.005 | 0.006 | 0.006 | 0.005 | 0.007 | 0.006 | 0.837 | 0.005 | 0.005 | 0.005 | 0.005 | 0.005 | 0.005 | 0.008 | 0.006 | 0.005 | 0.005 | 0.005 | 0.005 | 0.006 | 0.006 | 0.005 | 0.005 | 0.005 | 0.005 | 0.005 | 0.005 | 0.005 | 0.005 |
| D-HNR | 0.007 | 0.006 | 0.006 | 0.006 | 0.006 | 0.006 | 0.007 | 0.006 | 0.006 | 0.006 | 0.006 | 0.805 | 0.006 | 0.007 | 0.006 | 0.006 | 0.006 | 0.007 | 0.006 | 0.006 | 0.006 | 0.006 | 0.006 | 0.009 | 0.006 | 0.006 | 0.006 | 0.007 | 0.006 | 0.006 | 0.006 | 0.006 |       |
| D-LMB | 0.006 | 0.006 | 0.006 | 0.006 | 0.006 | 0.006 | 0.006 | 0.007 | 0.008 | 0.007 | 0.006 | 0.006 | 0.814 | 0.006 | 0.006 | 0.006 | 0.006 | 0.006 | 0.006 | 0.006 | 0.006 | 0.006 | 0.006 | 0.007 | 0.006 | 0.006 | 0.006 | 0.006 | 0.006 | 0.006 | 0.006 | 0.006 |       |
| E-PNT | 0.005 | 0.005 | 0.006 | 0.005 | 0.005 | 0.009 | 0.005 | 0.005 | 0.005 | 0.005 | 0.006 | 0.005 | 0.005 | 0.837 | 0.005 | 0.005 | 0.005 | 0.006 | 0.005 | 0.005 | 0.005 | 0.005 | 0.005 | 0.005 | 0.005 | 0.005 | 0.005 | 0.005 | 0.005 | 0.005 | 0.005 | 0.005 | 0.005 |
| E-CGB | 0.004 | 0.004 | 0.004 | 0.004 | 0.004 | 0.004 | 0.004 | 0.004 | 0.004 | 0.005 | 0.004 | 0.004 | 0.004 | 0.197 | 0.672 | 0.004 | 0.004 | 0.004 | 0.004 | 0.004 | 0.004 | 0.004 | 0.004 | 0.005 | 0.005 | 0.004 | 0.004 | 0.005 | 0.004 | 0.004 | 0.004 | 0.004 | 0.005 |
| E-BAC | 0.006 | 0.006 | 0.006 | 0.006 | 0.006 | 0.006 | 0.006 | 0.006 | 0.006 | 0.006 | 0.006 | 0.006 | 0.006 | 0.144 | 0.007 | 0.673 | 0.006 | 0.006 | 0.006 | 0.006 | 0.007 | 0.006 | 0.006 | 0.007 | 0.006 | 0.006 | 0.006 | 0.006 | 0.006 | 0.006 | 0.006 | 0.006 | 0.007 |
| E-SSB | 0.006 | 0.006 | 0.006 | 0.006 | 0.006 | 0.006 | 0.006 | 0.006 | 0.006 | 0.006 | 0.006 | 0.006 | 0.006 | 0.052 | 0.013 | 0.006 | 0.673 | 0.007 | 0.006 | 0.006 | 0.007 | 0.006 | 0.006 | 0.009 | 0.007 | 0.006 | 0.006 | 0.007 | 0.006 | 0.006 | 0.006 | 0.006 | 0.092 |
| E-BLM | 0.005 | 0.005 | 0.005 | 0.006 | 0.006 | 0.006 | 0.006 | 0.006 | 0.006 | 0.006 | 0.006 | 0.006 | 0.006 | 0.007 | 0.005 | 0.005 | 0.005 | 0.824 | 0.006 | 0.005 | 0.006 | 0.006 | 0.006 | 0.008 | 0.006 | 0.005 | 0.006 | 0.006 | 0.006 | 0.006 | 0.006 | 0.005 | 0.006 |
| P-HND | 0.008 | 0.005 | 0.005 | 0.005 | 0.005 | 0.009 | 0.007 | 0.007 | 0.006 | 0.013 | 0.007 | 0.005 | 0.005 | 0.007 | 0.005 | 0.005 | 0.005 | 0.012 | 0.806 | 0.006 | 0.009 | 0.005 | 0.005 | 0.009 | 0.006 | 0.005 | 0.005 | 0.005 | 0.005 | 0.005 | 0.005 | 0.005 | 0.007 |
| V-UNB | 0.005 | 0.005 | 0.005 | 0.005 | 0.005 | 0.005 | 0.006 | 0.005 | 0.006 | 0.007 | 0.007 | 0.010 | 0.006 | 0.037 | 0.006 | 0.005 | 0.005 | 0.006 | 0.006 | 0.696 | 0.009 | 0.005 | 0.006 | 0.010 | 0.005 | 0.005 | 0.005 | 0.006 | 0.005 | 0.005 | 0.005 | 0.006 | 0.095 |
| V-STN | 0.005 | 0.005 | 0.005 | 0.005 | 0.005 | 0.005 | 0.005 | 0.007 | 0.006 | 0.006 | 0.006 | 0.006 | 0.005 | 0.019 | 0.006 | 0.005 | 0.005 | 0.025 | 0.006 | 0.005 | 0.772 | 0.005 | 0.006 | 0.014 | 0.006 | 0.005 | 0.005 | 0.006 | 0.005 | 0.005 | 0.005 | 0.005 | 0.027 |
| V-SII | 0.005 | 0.006 | 0.005 | 0.005 | 0.005 | 0.006 | 0.005 | 0.005 | 0.005 | 0.005 | 0.005 | 0.005 | 0.005 | 0.008 | 0.005 | 0.005 | 0.005 | 0.005 | 0.005 | 0.005 | 0.005 | 0.834 | 0.011 | 0.006 | 0.005 | 0.005 | 0.006 | 0.006 | 0.005 | 0.005 | 0.005 | 0.005 |       |
| V-BTY | 0.005 | 0.004 | 0.005 | 0.005 | 0.005 | 0.005 | 0.005 | 0.004 | 0.004 | 0.005 | 0.004 | 0.004 | 0.005 | 0.005 | 0.004 | 0.004 | 0.005 | 0.005 | 0.004 | 0.005 | 0.005 | 0.010 | 0.845 | 0.009 | 0.005 | 0.004 | 0.005 | 0.007 | 0.004 | 0.004 | 0.005 | 0.006 |       |
| V-ALB | 0.005 | 0.005 | 0.005 | 0.005 | 0.005 | 0.007 | 0.005 | 0.005 | 0.005 | 0.005 | 0.005 | 0.005 | 0.005 | 0.006 | 0.005 | 0.004 | 0.004 | 0.009 | 0.006 | 0.005 | 0.005 | 0.005 | 0.005 | 0.836 | 0.007 | 0.005 | 0.005 | 0.006 | 0.005 | 0.005 | 0.005 | 0.010 |       |
| V-PAB | 0.006 | 0.006 | 0.005 | 0.005 | 0.005 | 0.006 | 0.005 | 0.005 | 0.005 | 0.005 | 0.005 | 0.005 | 0.005 | 0.010 | 0.005 | 0.005 | 0.005 | 0.008 | 0.007 | 0.005 | 0.006 | 0.005 | 0.005 | 0.014 | 0.819 | 0.005 | 0.005 | 0.008 | 0.005 | 0.005 | 0.005 | 0.007 |       |
| V-TCL | 0.006 | 0.006 | 0.006 | 0.006 | 0.006 | 0.006 | 0.006 | 0.006 | 0.006 | 0.006 | 0.006 | 0.006 | 0.006 | 0.006 | 0.006 | 0.006 | 0.006 | 0.006 | 0.006 | 0.006 | 0.006 | 0.006 | 0.143 | 0.006 | 0.006 | 0.674 | 0.006 | 0.006 | 0.006 | 0.006 | 0.006 | 0.006 |       |
| V-GUI | 0.005 | 0.005 | 0.005 | 0.005 | 0.005 | 0.005 | 0.005 | 0.005 | 0.005 | 0.005 | 0.005 | 0.005 | 0.005 | 0.005 | 0.005 | 0.005 | 0.005 | 0.005 | 0.005 | 0.005 | 0.005 | 0.005 | 0.010 | 0.005 | 0.005 | 0.005 | 0.841 | 0.005 | 0.005 | 0.005 | 0.005 | 0.005 |       |
| M-OPL | 0.006 | 0.006 | 0.006 | 0.005 | 0.005 | 0.006 | 0.006 | 0.006 | 0.005 | 0.005 | 0.006 | 0.005 | 0.005 | 0.006 | 0.005 | 0.006 | 0.006 | 0.006 | 0.005 | 0.005 | 0.006 | 0.006 | 0.007 | 0.007 | 0.006 | 0.006 | 0.005 | 0.827 | 0.005 | 0.005 | 0.005 | 0.006 |       |
| M-LGD | 0.005 | 0.005 | 0.005 | 0.005 | 0.005 | 0.005 | 0.005 | 0.005 | 0.005 | 0.005 | 0.005 | 0.006 | 0.005 | 0.006 | 0.005 | 0.005 | 0.005 | 0.007 | 0.005 | 0.005 | 0.005 | 0.005 | 0.005 | 0.118 | 0.022 | 0.005 | 0.005 | 0.038 | 0.678 | 0.005 | 0.005 | 0.005 |       |
| M-RIZ | 0.005 | 0.005 | 0.005 | 0.005 | 0.005 | 0.005 | 0.005 | 0.005 | 0.005 | 0.005 | 0.005 | 0.005 | 0.005 | 0.008 | 0.008 | 0.005 | 0.005 | 0.010 | 0.005 | 0.006 | 0.005 | 0.006 | 0.005 | 0.159 | 0.005 | 0.005 | 0.005 | 0.005 | 0.005 | 0.672 | 0.005 | 0.007 |       |
| M-BAT | 0.007 | 0.007 | 0.007 | 0.006 | 0.007 | 0.006 | 0.006 | 0.007 | 0.007 | 0.007 | 0.007 | 0.006 | 0.007 | 0.008 | 0.007 | 0.007 | 0.006 | 0.009 | 0.007 | 0.006 | 0.007 | 0.007 | 0.007 | 0.007 | 0.007 | 0.007 | 0.007 | 0.007 | 0.007 | 0.674 | 0.125 |       |       |
| M-SAG | 0.006 | 0.006 | 0.006 | 0.006 | 0.006 | 0.007 | 0.007 | 0.006 | 0.006 | 0.007 | 0.006 | 0.006 | 0.006 | 0.011 | 0.006 | 0.006 | 0.006 | 0.007 | 0.007 | 0.007 | 0.008 | 0.009 | 0.006 | 0.008 | 0.006 | 0.006 | 0.006 | 0.006 | 0.006 | 0.006 | 0.007 | 0.793 |       |

High migration rates (more than 0.1) are highlighted in gray cells. P-PPB was removed due to the low sample size after removal of clonal replicates.
